# Supplementary material for: Enhanced indirect atomic H* reduction at a hybrid Pd/graphene cathode for electrochemical dechlorination under low negative potentials
Source: Royal Society of Chemistry journal article supplement (doi:10.1039/c8en00727f), 2018-01-01
Supplement: c8en00727f1.pdf [file c8en00727f1.pdf]

## Supporting Information

### **Enhanced indirect atomic H<sup>\*</sup> reduction at a hybrid Pd/graphene cathode for electrochemical dechlorination under low negative potentials**

Ran Mao<sup>a</sup>, Huachun Lan<sup>b, d, \*</sup>, Li Yan<sup>e</sup>, Xu Zhao<sup>a, c</sup>, Huijuan Liu<sup>b, c</sup> and Jiuhui Qu<sup>a, c</sup>

<sup>a</sup>Key Laboratory of Drinking Water Science and Technology, Research Center for Eco-Environmental Sciences, Chinese Academy of Sciences, Beijing, 100085, P.R. China

<sup>b</sup>School of Environment, State Key Joint Laboratory of Environment Simulation and Pollution Control, Tsinghua University, Beijing, 100084, P.R. China

<sup>c</sup>University of Chinese Academy of Sciences, Beijing, 100049, P.R. China

<sup>d</sup>Center for Water and Ecology, Tsinghua University, Beijing 100084, China

<sup>e</sup>State Key Laboratory of Environmental Chemistry and Ecotoxicology, Research Center for Eco-Environmental Sciences, Chinese Academy of Sciences, Beijing, 100085, P.R. China

\*Corresponding author: Tel.: +86-10-62849160; fax: +86-10-62849160; e-mail: hclan@tsinghua.edu.cn.

## Calculation results:

Cartesian coordinates for Pd-H and Pd/rGO-H reported in the manuscript.

| <b>Table S1.</b> Cartesian coordinates for Pd-H |                         |          |          |
|-------------------------------------------------|-------------------------|----------|----------|
| Atomic Types                                    | Coordinates (Angstroms) |          |          |
|                                                 | X                       | Y        | Z        |
| H                                               | 1.161325                | 2.30293  | 0        |
| Pd                                              | -1.61411                | -0.8661  | -1.42289 |
| Pd                                              | -1.61411                | -0.8661  | 1.42289  |
| Pd                                              | -0.53113                | -2.93329 | 0        |
| Pd                                              | 1.213315                | -1.22766 | 1.446583 |
| Pd                                              | 1.213315                | -1.22766 | -1.44658 |
| Pd                                              | -2.63395                | 1.252678 | 2.645655 |
| Pd                                              | -2.63395                | 1.252678 | -2.64566 |
| Pd                                              | -2.56935                | 1.433586 | 0        |
| Pd                                              | 0.049919                | 1.055869 | 0        |
| Pd                                              | 0.009337                | 1.120237 | 2.64086  |
| Pd                                              | 2.634229                | 0.707594 | 2.651885 |
| Pd                                              | 0.009337                | 1.120237 | -2.64086 |
| Pd                                              | 2.634229                | 0.707594 | -2.65189 |
| Pd                                              | 2.671602                | 0.773266 | 0        |

  

| <b>Table S2.</b> Cartesian coordinates for Pd/rGO-H |                         |          |          |
|-----------------------------------------------------|-------------------------|----------|----------|
| Atomic Types                                        | Coordinates (Angstroms) |          |          |
|                                                     | X                       | Y        | Z        |
| C                                                   | -4.05372                | -3.07696 | -0.37752 |
| C                                                   | -1.95027                | -4.36288 | -0.73347 |
| C                                                   | -4.74518                | -1.86812 | -0.50943 |
| C                                                   | -4.07223                | -0.6628  | -0.95075 |
| C                                                   | -2.64087                | -3.16276 | -0.6861  |
| C                                                   | -1.92964                | -1.90973 | -0.88238 |
| C                                                   | 0.198061                | -5.6035  | -0.87886 |
| C                                                   | 2.352195                | -6.83719 | -0.95191 |
| C                                                   | -0.52512                | -4.40917 | -0.82223 |
| C                                                   | 0.196466                | -3.16223 | -0.77626 |
| C                                                   | 1.61599                 | -5.63115 | -0.85795 |
| C                                                   | 2.338045                | -4.40093 | -0.72038 |
| C                                                   | 3.746078                | -6.82573 | -0.91557 |

  

|    |          |          |          |
|----|----------|----------|----------|
| C  | 4.452464 | -5.62863 | -0.76985 |
| C  | -4.75188 | 0.521828 | -1.18512 |
| C  | -4.06339 | 1.764013 | -1.30064 |
| C  | -2.62788 | -0.6913  | -1.03733 |
| C  | -1.91599 | 0.539351 | -1.11828 |
| C  | -4.73535 | 2.985659 | -1.41842 |
| C  | -4.0629  | 4.226552 | -1.30294 |
| C  | -2.62983 | 1.761837 | -1.16073 |
| C  | -1.95346 | 2.998439 | -0.94197 |
| C  | -4.73693 | 5.469048 | -1.40021 |
| C  | -4.05383 | 6.667126 | -1.20009 |
| C  | -2.65894 | 4.229112 | -1.00956 |
| C  | -1.97322 | 5.463826 | -0.76437 |
| C  | -2.6932  | 6.673176 | -0.8796  |
| C  | -0.49997 | -1.92414 | -0.854   |
| C  | 0.222624 | -0.67946 | -0.87966 |
| C  | 1.620922 | -3.17314 | -0.65228 |
| C  | 2.326406 | -1.92613 | -0.50686 |
| C  | -0.49132 | 0.543672 | -0.96446 |
| C  | 0.189335 | 1.768854 | -0.69386 |
| C  | 1.630809 | -0.68066 | -0.66476 |
| C  | 2.324364 | 0.556453 | -0.47667 |
| C  | 3.770442 | -4.39621 | -0.66244 |
| C  | 4.451251 | -3.16401 | -0.46064 |
| C  | 3.772398 | -1.95155 | -0.34873 |
| C  | 4.434104 | -0.70067 | -0.06052 |
| C  | -0.55893 | 2.988309 | -0.59929 |
| C  | 0.103085 | 4.235114 | -0.27106 |
| C  | 1.604724 | 1.768043 | -0.45495 |
| C  | 2.260761 | 2.999498 | -0.05425 |
| C  | -0.60417 | 5.4296   | -0.37975 |
| C  | 1.489203 | 4.18029  | 0.137674 |
| C  | 3.743656 | 0.540606 | -0.1552  |
| C  | 4.441224 | 1.807767 | -0.039   |
| C  | 3.711638 | 3.017654 | 0.029917 |
| Pd | 2.399282 | -1.3791  | 4.25677  |
| Pd | -0.34097 | -1.09415 | 4.241321 |
| Pd | 1.145675 | 0.178064 | 6.21226  |
| Pd | -0.2297  | 1.843814 | 4.260005 |

|    |          |          |          |
|----|----------|----------|----------|
| Pd | 2.671397 | 1.44901  | 4.15302  |
| Pd | -3.77039 | -1.83359 | 1.585118 |
| Pd | 1.848245 | -2.25874 | 1.737364 |
| Pd | -0.92176 | -1.80914 | 1.634488 |
| Pd | 0.844576 | 0.305424 | 2.259167 |
| Pd | -2.25658 | 0.230214 | 2.876386 |
| Pd | -1.02769 | 2.323759 | 1.600023 |
| Pd | 3.69395  | -0.26301 | 2.041327 |
| Pd | 4.258887 | 2.451802 | 2.11737  |
| Pd | 1.555246 | 3.111733 | 2.158351 |
| H  | 1.209399 | 1.684778 | 5.309346 |

---

**Table S3.** XPS analysis of Pd component obtained from the Pd 3d spectrum.

| Electrode  | Components                         | Pos. (eV) | FWHM (eV) | %Area |
|------------|------------------------------------|-----------|-----------|-------|
| Pd/CFP     | Pd <sup>0</sup> 3d <sub>5/2</sub>  | 335.07    | 1.05      | 53.80 |
|            | Pd <sup>0</sup> 3d <sub>3/2</sub>  | 340.33    | 1.05      | 35.84 |
|            | PdO <sub>x</sub> 3d <sub>5/2</sub> | 336.54    | 2.05      | 6.22  |
|            | PdO <sub>x</sub> 3d <sub>3/2</sub> | 341.82    | 2.05      | 4.14  |
| Pd/rGO/CFP | Pd <sup>0</sup> 3d <sub>5/2</sub>  | 335.07    | 0.93      | 42.30 |
|            | Pd <sup>0</sup> 3d <sub>3/2</sub>  | 340.33    | 0.93      | 28.18 |
|            | PdO <sub>x</sub> 3d <sub>5/2</sub> | 336.54    | 1.67      | 17.72 |
|            | PdO <sub>x</sub> 3d <sub>3/2</sub> | 341.82    | 1.67      | 11.81 |

**Table S4.** XPS analysis of C component obtained from the C 1s spectrum.

| Electrode  | Components | Pos. (eV) | FWHM (eV) | %Area |
|------------|------------|-----------|-----------|-------|
| rGO/CFP    | C-C/C=C    | 284.80    | 1.52      | 57.37 |
|            | C-O        | 286.13    | 1.52      | 15.79 |
|            | O-C=O      | 288.62    | 2.59      | 26.84 |
| Pd/rGO/CFP | C-C/C=C    | 284.80    | 1.38      | 70.53 |
|            | C-O        | 286.18    | 1.38      | 11.44 |
|            | O-C=O      | 288.90    | 2.28      | 18.03 |

**Table S5.** Comparison of TCAA dechlorination performance of different electrodes.

| Cathode materials                | Initial TCAA concentration | $E_{\text{CAT}}$ (V vs SCE) | Removal efficiency (%) | Refs.     |
|----------------------------------|----------------------------|-----------------------------|------------------------|-----------|
| Pd/Fe-C                          | 500 $\mu\text{g/L}$        | -1.5                        | 90.0 (40 min)          | [1]       |
| Cu tubing                        | 100 mg/L                   | -1.0                        | 65.2 (25 min)          | [2]       |
| Graphene/Cu foam                 | 500 $\mu\text{g/L}$        | -1.2                        | 99.6 (40 min)          | [3]       |
| MoS <sub>2</sub> /carbon felt    | 1.6 mg/L                   | -1.1                        | 36.0 (10 min)          | [4]       |
| Co-MoS <sub>2</sub> /carbon felt | 1.6 mg/L                   | -1.1                        | 100.0 (10 min)         | [4]       |
| Pd/rGO/CFP                       | 500 $\mu\text{g/L}$        | -0.5                        | 81.5 (40 min)          | This work |

## References

- [1] A. Z. Li, X. Zhao, Y. N. Hou, H. J. Liu, L.Y. Wu, J. H. Qu, The Electrocatalytic dechlorination of chloroacetic acids at electrodeposited Pd/Fe-modified carbon paper electrode. *Appl. Catal., B: Environ.*, 2012, 111-112, 628-635.
- [2] G. V. Korshin, M. D. Jensen, Electrochemical reduction of haloacetic acids and exploration of their removal by electrochemical treatment. *Electrochim. Acta* 2001, 47, 747-751.
- [3] R. Mao, N. Li, H. C. Lan, X. Zhao, H. J. Liu, J. H. Qu, M. Sun, Dechlorination of trichloroacetic acid using a noble metal-free graphene-Cu foam electrode via direct cathodic reduction and atomic H\*. *Environ. Sci. Technol.*, 2016, 50, 3829-3837.
- [4] L. Z. Huang, S. U. Pedersen, E. T. Bjerglund, P. Lamagni, M. Glasius, H. C. B. Hansen, K. Daasbjerg, Hierarchical MoS<sub>2</sub> nanosheets on flexible carbon felt as an efficient flow-through electrode for dechlorination. *Environ. Sci.: Nano*, 2017, 4, 2286-2296.

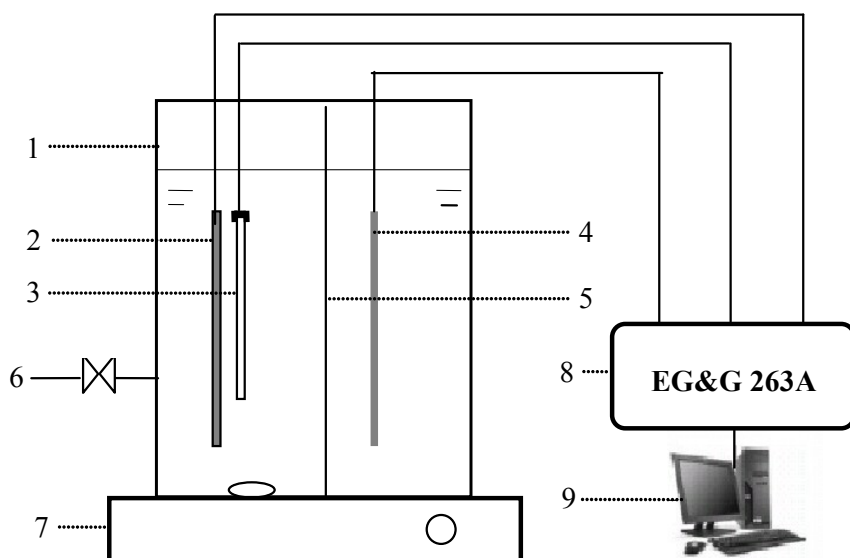

**Figure S1.** Schematic diagram of the experimental set-up. (1) reactor; (2) cathode; (3) reference electrode (SCE); (4) anode: platinum wire; (5) proton-exchange membrane; (6) sampling port; (7) magnetic stirrer; (8) electrochemical workstation; (9) Computer.

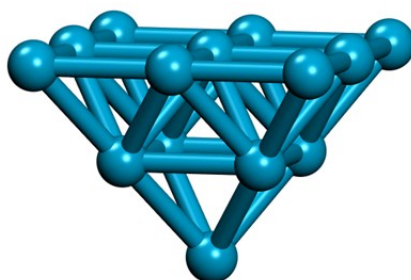

**Figure S2.** Pd<sub>14</sub> cluster, showing four {111} and one {100} faces.

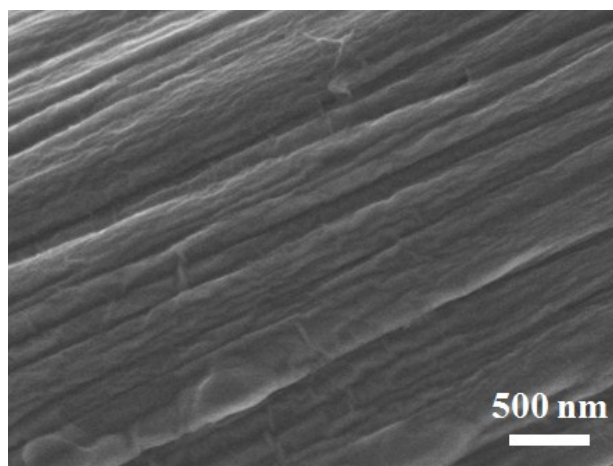

**Figure S3.** SEM image of GO on CFP.

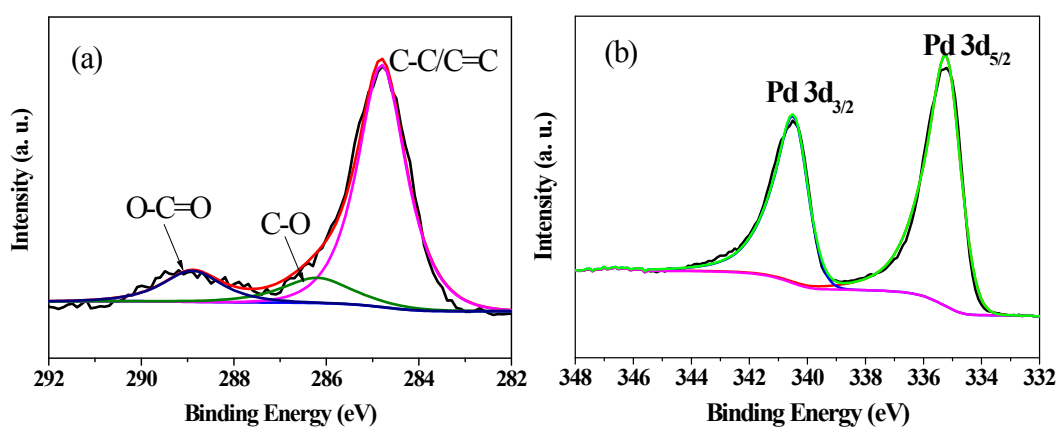

**Figure S4.** (a) XPS C 1s spectrum and (c) Pd 3d spectrum of the Pd/rGO/CFP electrode after electrochemical reduction process .
